# Supplementary material
Source: Springer Nature journal article supplement (https://www.springermedizin.de/resource/supplementary/13256_2011_1992_MOESM1_ESM.pdf/9649182)

a.

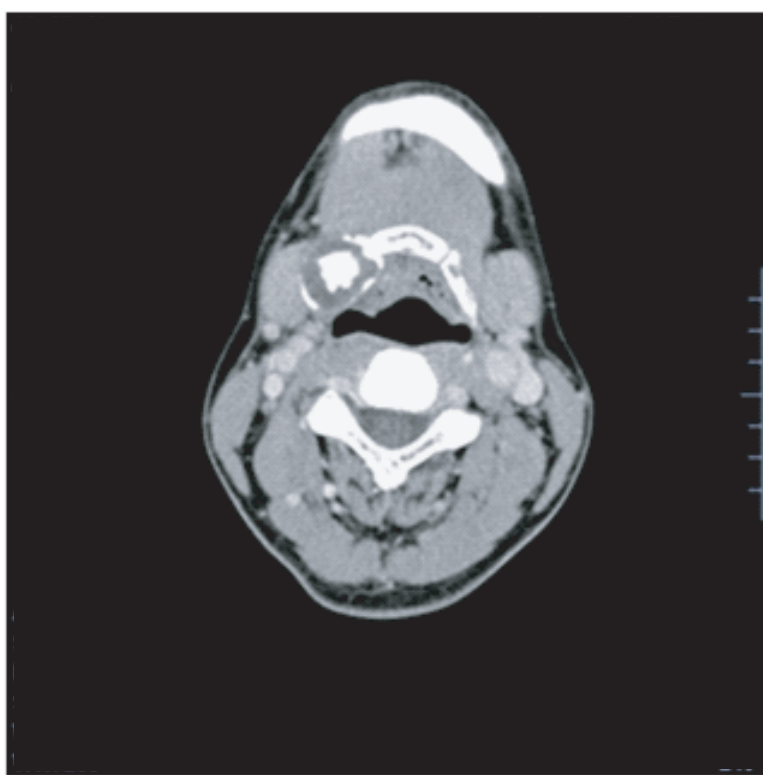

b.

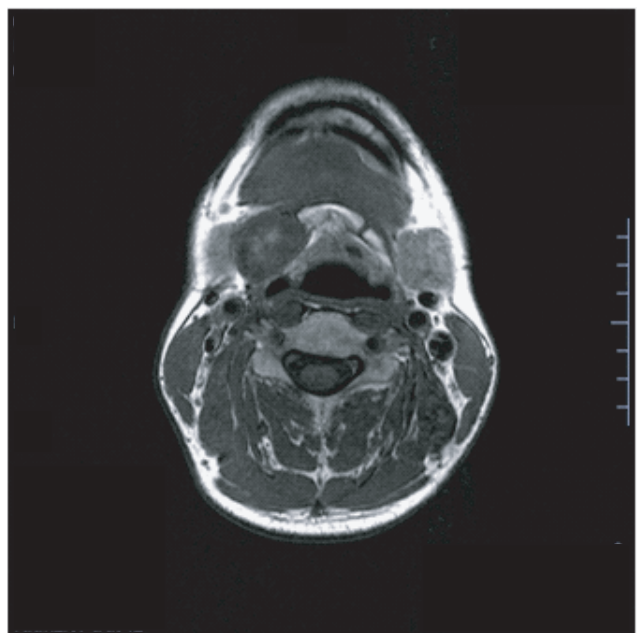

c.

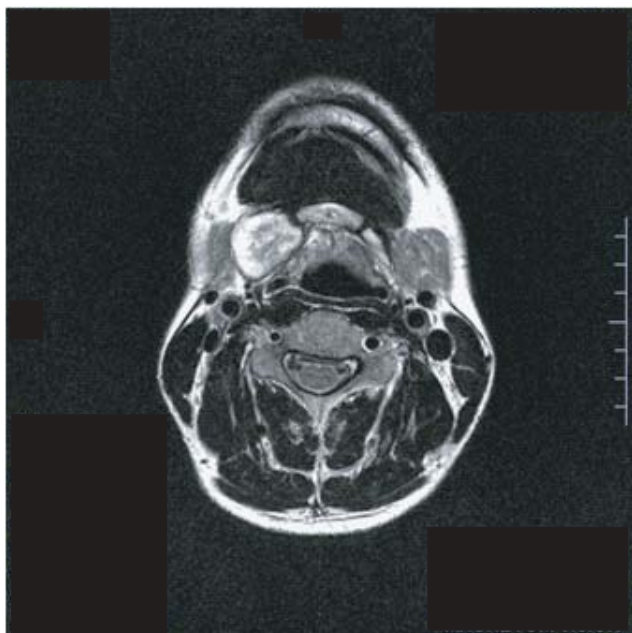

Supplement: MOESM1 [file 9649182]
